# Supplementary material
Source: PubMed Central journal article supplement (PMC3138273)
Supplement: supp_M110.211292_jbc.M110.211292-1.pdf [file supp_M110.211292_jbc.M110.211292-1.pdf]

**Supplemental Table 1. PCR primers**

| <b>PCR PRIMERS</b>                              | <b>Forward primer 5' → 3'</b>          | <b>Reverse primer 5' → 3'</b>         |
|-------------------------------------------------|----------------------------------------|---------------------------------------|
| <b>P-Rex1 promoter<sup>a</sup></b>              |                                        |                                       |
| P(-2024/+3)                                     | GGAAGATCTGCTCTCACAAAGACTCCCCTTTT       | CCCAAGCTTGCTCCTTCCGTCGCGCCGAG         |
| P(-576/+3)                                      | GGAAGATCTCTCCGCAGCGAGCTTCCCAGCCC       | CCCAAGCTTCCGGCTCCTTCCGTCGCGCC         |
| P(-427/+3)                                      | CCGGGCGCGGAGTTGGTA                     | AGCTCGCTGCGGAGAGAT                    |
| P(-258/+3)                                      | GAGCGCGGCGTGGCACTT                     | AGCTCGCTGCGGAGAGAT                    |
| P(-208/+3)                                      | CAGCCGTCTGGGAGCCCCGAG                  | AGCTCGCTGCGGAGAGAT                    |
| P(-190/+3)                                      | GAGGGCCGCCCTCCCGCC                     | AGCTCGCTGCGGAGAGAT                    |
| P(-98/+3)                                       | GGGAGCCCCGGCCGCGCTGA                   | AGCTCGCTGCGGAGAGAT                    |
| <b>Sp1 binding site mutagenesis<sup>b</sup></b> |                                        |                                       |
| Sp1-1/2m                                        | GCGCGCTGCCTC <u>ATAA</u> CCCGGCCAGCCGC | GGGGGCCGGGCGAGG <u>TTAT</u> GGAGGGGGC |
| Sp1-1m                                          | GCGCGCTGCCTCCGCCCGGCCAGCCGC            | GGGGGCCGGGCGAGG <u>TTAT</u> GGAGGGGGC |
| Sp1-2m                                          | GCGCGCTGCCTC <u>ATAA</u> CCCGGCCAGCCGC | GGGGGCCGGGCGAGGGCCGGGAGGGGGC          |
| <b>HA-tagged Sp1<sup>a</sup></b>                |                                        |                                       |
| Sp1-HA                                          | GGACTCGAGATGGATGAAATGACAGCTGTG         | GGAGGTACCGAAGCCATTGCCACTGATATT        |
| <b>RT-PCR / real-time RT-PCR</b>                |                                        |                                       |
| P-Rex1 (163 bp)                                 | CCTTCTTCTCTTCGACAAC                    | GTGGAGAATGTGGAAGATGG                  |
| β-Actin (180 bp)                                | AGCACGGCATCGTCACCAACT                  | TGGCTGGGGTGTGTAAGGTCT                 |
| β-Actin (93 bp)                                 | AATGTGGCCGAGGACTTTGATTGC               | AGGATGGCAAGGGACTTCTGTAA               |
| <b>P-Rex1 ChIP</b>                              |                                        |                                       |
| P(-247/-78)                                     | GGCACTTGGCAGACGGTCCCTGGCG              | TCAGCGGCGGGCCGGGCTCCC                 |

<sup>a</sup> Restriction enzyme sites are indicated in italics

<sup>b</sup> Mutated nucleotides are underlined
